# Supplementary material for: Clinical and molecular genetic characterization of familial MECP2 duplication syndrome in a Chinese family
Source: Springer Nature journal article supplement (doi:10.1186/s12881-017-0486-4), 2017-11-15
Supplement: MOESM1 [file 15227054]

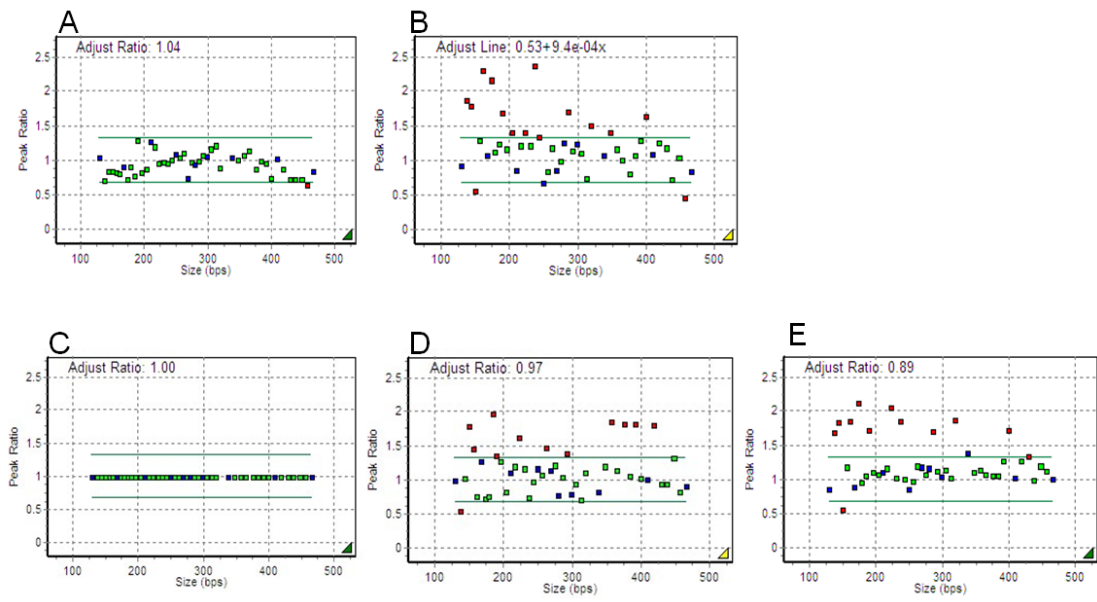

Figure S1. The MLPA result of the family members. A, C show the female and male control, respectively. B, D and E show II:3, IV:2 and III:6, respectively.
