# Supplementary material for: Clinical and molecular genetic characterization of familial MECP2 duplication syndrome in a Chinese family
Source: Springer Nature journal article supplement (doi:10.1186/s12881-017-0486-4), 2017-11-15
Supplement: MOESM2 [file 15227054]

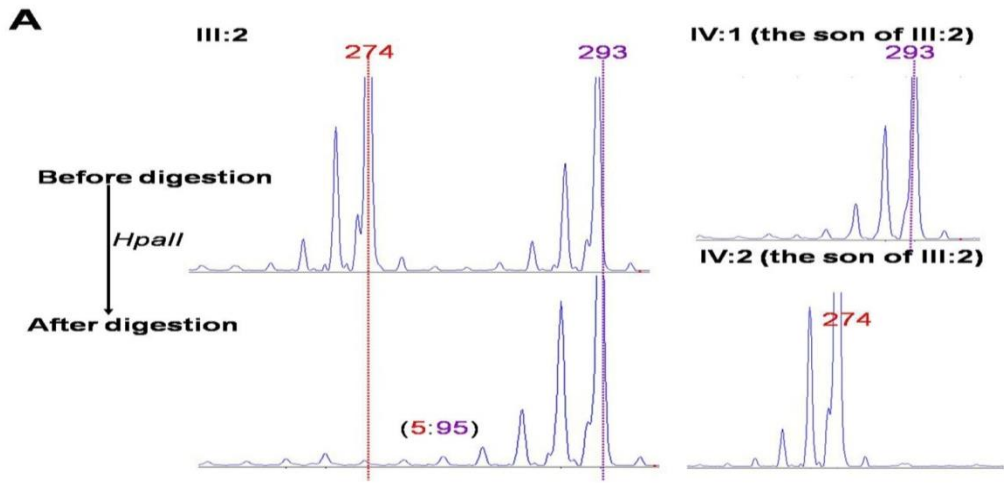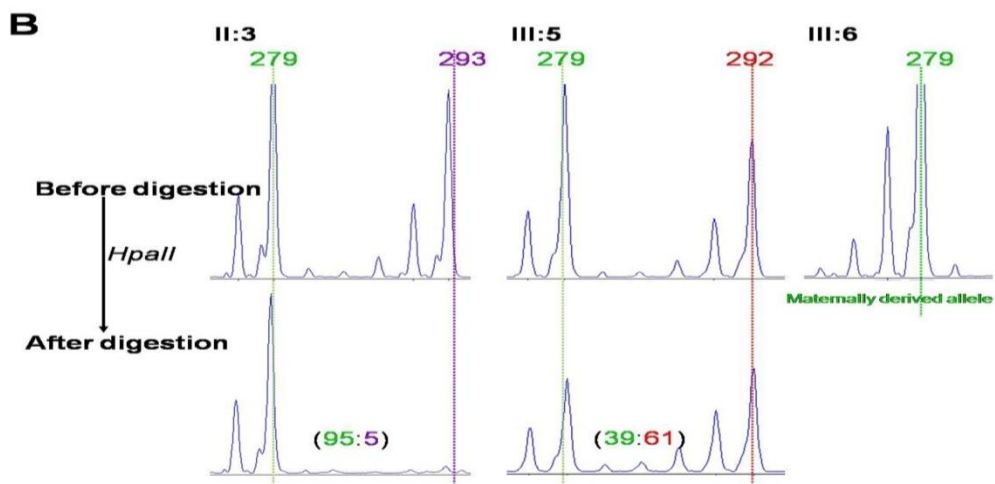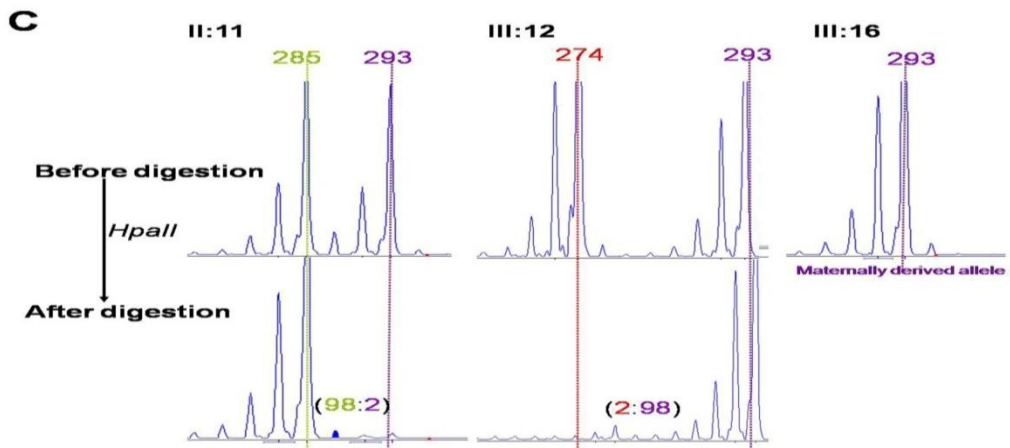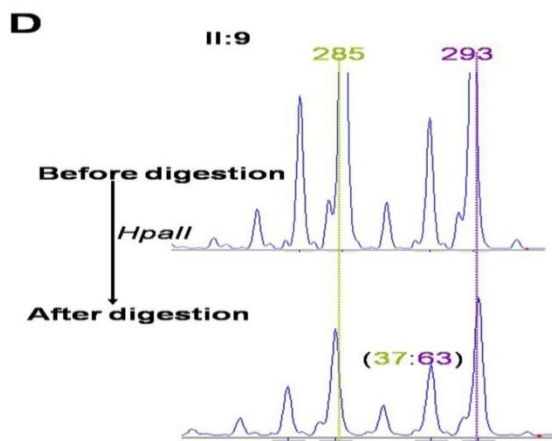

Figure S2. X-chromosome inactivation results analyzed using (CAG)<sub>n</sub> STR of *AR* gene. A shows that the X-chromosome inactivation (XCI) pattern of carrier III:2 is skewed. Her two sons carry the allele-293 and allele-274. B shows that the XCI pattern of II:3 is skewed but the XCI pattern of her daughter III:5 is random (not skewed). C shows that the XCI pattern of II:11 is skewed and that the XCI pattern of her daughter III:12 is also skewed. D shows that the XCI pattern of II:9 is random.
