# Supplementary material for: Clinical and molecular genetic characterization of familial MECP2 duplication syndrome in a Chinese family
Source: Springer Nature journal article supplement (doi:10.1186/s12881-017-0486-4), 2017-11-15
Supplement: MOESM3 [file 15227054]

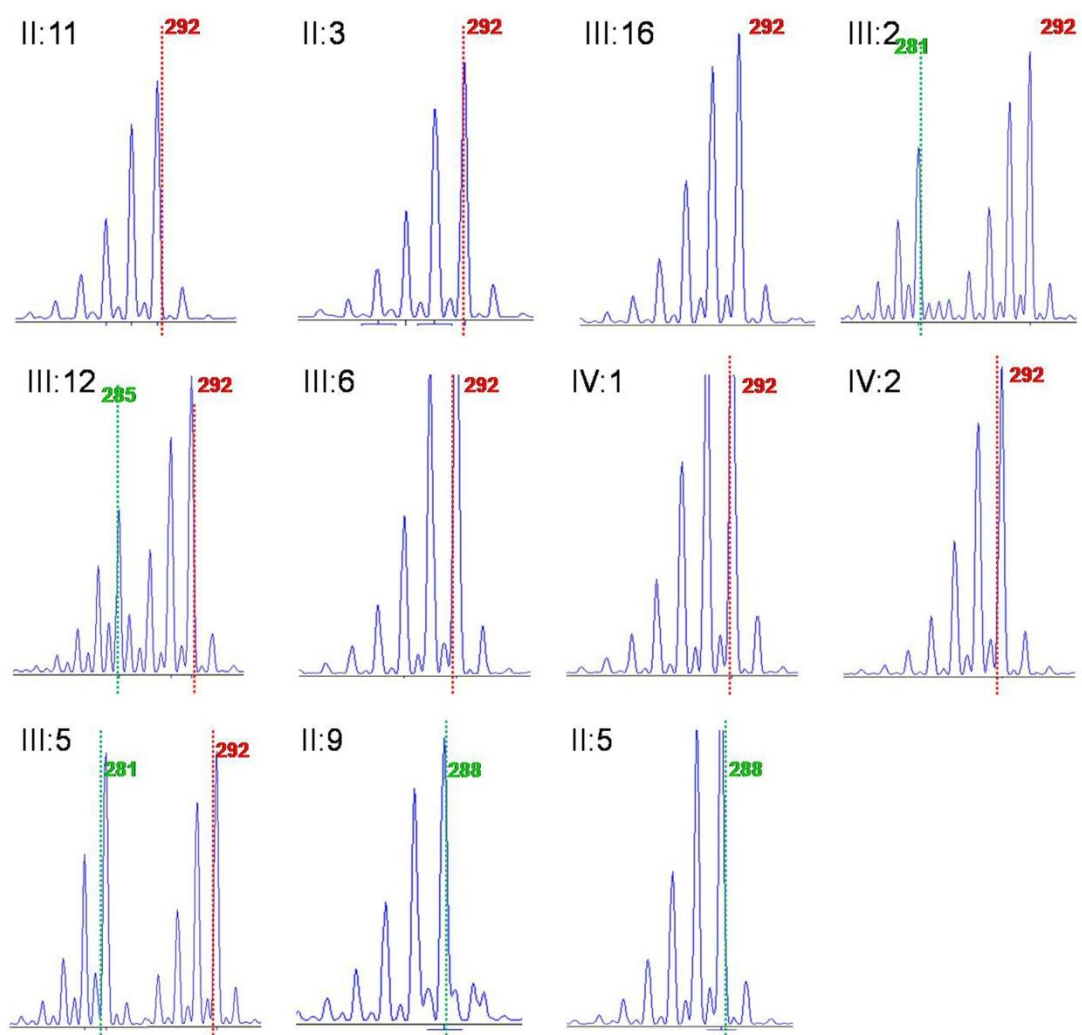

Figure S3. The results for microsatellite 23xGT of *MECP2* gene.
